# Supplementary material for: Rain-on-snow events in mountainous catchments under climate change
Source: Copernicus journal article supplement (doi:10.5194/egusphere-2024-2274), 2024-10-08
Supplement: Supplementary file 1 [file egusphere-2024-2274-supplement.pdf]

**Table S1: Selected characteristics of all study catchments. Catchment IDs are set by 1) country: CZ – Czechia (including catchments in Germany), CH – Switzerland, 2) mountain region in Czechia and Germany: 100 – Bohemian and Bavarian Forest, 200 – Ore Mountains, 300 – Western Sudetes, 400 – Central Sudetes, 500 – Eastern Sudetes, 600 – Western Carpathians; in Switzerland: 100 – Jura and Swiss Plateau, 200 – Central Alps, 300 – Southern Alps. Catchments (IDs) are ordered with regard to geographical locations from west to east within individual mountain regions. Climate and snow characteristics represent annual means from the 1980-2010 period valid for mean catchment elevation, based on the modeled values.**

| ID     | Catchment       | Gauging station   | Area<br>[km <sup>2</sup> ] | Mean elevation (range)<br>[m a.s.l.] | Annual mean air temperature<br>[°C] | Annual precipitation<br>[mm] | Annual snowfall<br>[mm] | Maximum SWE<br>[mm] |
|--------|-----------------|-------------------|----------------------------|--------------------------------------|-------------------------------------|------------------------------|-------------------------|---------------------|
| CZ-101 | Schwarzach      | Höll              | 59.9                       | 652 (494-1042)                       | 7.1                                 | 894                          | 140                     | 70                  |
| CZ-102 | Weisser Regen   | Lohberg           | 39.3                       | 928 (577-1456)                       | 6.2                                 | 1238                         | 257                     | 198                 |
| CZ-103 | Ostruzna        | Kolinec           | 92.0                       | 755 (541-1165)                       | 6.1                                 | 892                          | 112                     | 53                  |
| CZ-104 | Vydra           | Modrava           | 89.8                       | 1140 (983-1345)                      | 4.6                                 | 1279                         | 273                     | 197                 |
| CZ-105 | Otava           | Rejstejn          | 333.6                      | 1017 (598-1345)                      | 5.7                                 | 1205                         | 225                     | 123                 |
| CZ-106 | Hamerský potok  | Antygl            | 20.4                       | 1098 (978-1213)                      | 5.0                                 | 1225                         | 290                     | 139                 |
| CZ-107 | Spulka          | Bohumilice        | 104.6                      | 804 (558-1131)                       | 7.6                                 | 773                          | 129                     | 44                  |
| CZ-108 | Volynka         | Nemetice          | 383.4                      | 722 (430-1302)                       | 8.3                                 | 781                          | 95                      | 45                  |
| CZ-109 | Teplá Vltava    | Lenora            | 176.0                      | 1010 (765-1314)                      | 4.0                                 | 975                          | 183                     | 93                  |
| CZ-110 | Teplá Vltava    | Chlum             | 347.3                      | 939 (733-1314)                       | 4.6                                 | 957                          | 155                     | 75                  |
| CZ-111 | Stasský potok   | Nový Dvůr         | 9.9                        | 962 (792-1131)                       | 6.2                                 | 951                          | 189                     | 76                  |
| CZ-112 | Sausswasser     | Linden            | 89.7                       | 899 (651-1308)                       | 4.9                                 | 950                          | 116                     | 83                  |
| CZ-113 | Studena Vltava  | Černý Kriz        | 102.4                      | 921 (738-1353)                       | 4.7                                 | 971                          | 142                     | 79                  |
| CZ-114 | Blanice         | Blanický Mlýn     | 85.5                       | 892 (757-1197)                       | 4.2                                 | 757                          | 135                     | 59                  |
| CZ-115 | Blanice         | Poděvorský Mlýn   | 202.8                      | 844 (558-1274)                       | 4.9                                 | 731                          | 114                     | 49                  |
| CZ-201 | Zwota           | Klingenthal       | 55.7                       | 720 (541-943)                        | 5.4                                 | 1171                         | 264                     | 96                  |
| CZ-202 | Rolava          | Chaloupky         | 18.7                       | 902 (826-956)                        | 5.3                                 | 1223                         | 260                     | 213                 |
| CZ-203 | Rolava          | Stará Role        | 125.3                      | 761 (398-994)                        | 5.6                                 | 1087                         | 231                     | 131                 |
| CZ-204 | Natzschung      | Rothenthal        | 76.1                       | 763 (539-921)                        | 5.9                                 | 853                          | 148                     | 93                  |
| CZ-205 | Wilde Weißeritz | Rehefeld          | 15.4                       | 806 (686-911)                        | 6.1                                 | 828                          | 137                     | 80                  |
| CZ-206 | Wilde Weißeritz | Ammelsdorf        | 49.3                       | 734 (528-911)                        | 5.5                                 | 889                          | 169                     | 119                 |
| CZ-301 | Jerice          | Chrastava         | 76.0                       | 493 (295-862)                        | 7.7                                 | 901                          | 120                     | 58                  |
| CZ-302 | Černá Nisa      | Straz             | 18.3                       | 672 (368-850)                        | 6.3                                 | 1168                         | 186                     | 134                 |
| CZ-303 | Černá Nisa      | Uhlirská          | 1.8                        | 816 (786-850)                        | 4.9                                 | 1264                         | 285                     | 267                 |
| CZ-304 | Černá Desná     | Jezdecka          | 4.8                        | 899 (792-1007)                       | 4.5                                 | 1490                         | 438                     | 409                 |
| CZ-305 | Kamenice        | Bohunovsko        | 178.8                      | 699 (345-1069)                       | 5.7                                 | 1268                         | 354                     | 178                 |
| CZ-306 | Luzická Nisa    | Proseč            | 53.8                       | 611 (419-835)                        | 6.7                                 | 1085                         | 173                     | 109                 |
| CZ-307 | Smeda           | Bílý potok        | 26.5                       | 817 (412-1090)                       | 5.0                                 | 1219                         | 274                     | 242                 |
| CZ-308 | Smeda           | Frydlant          | 132.7                      | 588 (297-1113)                       | 6.7                                 | 1120                         | 203                     | 121                 |
| CZ-309 | Mumlava         | Janov             | 51.3                       | 970 (625-1404)                       | 4.7                                 | 1517                         | 495                     | 385                 |
| CZ-310 | Jizera          | Dolní Sýtova      | 321.8                      | 771 (399-1404)                       | 5.4                                 | 1328                         | 401                     | 246                 |
| CZ-311 | Jizerka         | Dolní Stepanice   | 44.2                       | 842 (490-1379)                       | 4.7                                 | 1432                         | 418                     | 211                 |
| CZ-312 | Malé Labe       | Prosečnice        | 72.8                       | 731 (376-1378)                       | 5.5                                 | 1218                         | 306                     | 137                 |
| CZ-313 | Cista           | Hostinne          | 77.4                       | 594 (358-1322)                       | 6.2                                 | 1170                         | 282                     | 93                  |
| CZ-314 | Modrý potok     | Modrý důl         | 2.6                        | 1297 (1076-1489)                     | 2.2                                 | 2103                         | 778                     | 674                 |
| CZ-315 | Upa             | Horní Maršov      | 82.0                       | 1030 (581-1495)                      | 3.2                                 | 1408                         | 477                     | 333                 |
| CZ-316 | Upa             | Horní Stare Mesto | 144.8                      | 902 (452-1495)                       | 4.1                                 | 1355                         | 411                     | 251                 |

| ID     | Catchment       | Gauging station      | Area<br>[km <sup>2</sup> ] | Mean elevation (range)<br>[m a.s.l.] | Annual mean air temperature<br>[°C] | Annual precipitation<br>[mm] | Annual snowfall<br>[mm] | Maximum SWE<br>[mm] |
|--------|-----------------|----------------------|----------------------------|--------------------------------------|-------------------------------------|------------------------------|-------------------------|---------------------|
| CZ-317 | Metuje          | Marsov nad Metuji    | 94.7                       | 584 (419-786)                        | 5.6                                 | 757                          | 113                     | 57                  |
| CZ-401 | Bela            | Castolovice          | 214.1                      | 491 (269-1104)                       | 7.8                                 | 952                          | 174                     | 68                  |
| CZ-402 | Knezna          | Rychnov nad Kneznou  | 75.4                       | 502 (305-861)                        | 7.9                                 | 963                          | 165                     | 63                  |
| CZ-403 | Zdobnice        | Slatina nad Zdobnici | 84.1                       | 721 (395-1092)                       | 6.4                                 | 1140                         | 232                     | 187                 |
| CZ-404 | Divoka Orlice   | Klasterec nad Orlici | 153.6                      | 728 (505-1078)                       | 6.5                                 | 1136                         | 207                     | 164                 |
| CZ-405 | Ticha Orlice    | Sobkovice            | 98.5                       | 622 (459-965)                        | 7.0                                 | 900                          | 149                     | 110                 |
| CZ-501 | Morava          | Vlaske               | 96.5                       | 790 (448-1374)                       | 5.5                                 | 979                          | 222                     | 172                 |
| CZ-502 | Morava          | Raskov               | 350.0                      | 745 (380-1378)                       | 5.6                                 | 940                          | 213                     | 170                 |
| CZ-503 | Krupa           | Habartice            | 109.3                      | 756 (480-1267)                       | 5.7                                 | 981                          | 213                     | 193                 |
| CZ-504 | Telcsky potok   | Stare Mesto          | 21.9                       | 802 (548-1102)                       | 5.4                                 | 1176                         | 223                     | 137                 |
| CZ-505 | Branna          | Jindrichov           | 90.3                       | 794 (474-1378)                       | 5.5                                 | 1124                         | 213                     | 123                 |
| CZ-506 | Desna           | Sumperk              | 246.9                      | 736 (320-1454)                       | 5.5                                 | 882                          | 166                     | 96                  |
| CZ-507 | Stribrny potok  | Zulova               | 21.4                       | 712 (390-1108)                       | 6.0                                 | 1083                         | 183                     | 99                  |
| CZ-508 | Bela            | Jesenik              | 118.0                      | 799 (443-1390)                       | 4.5                                 | 1114                         | 264                     | 132                 |
| CZ-509 | Moravice        | Velka Stahle         | 168.6                      | 800 (549-1415)                       | 4.9                                 | 786                          | 138                     | 110                 |
| CZ-510 | Cerna Opava     | Mnichov              | 51.0                       | 814 (579-1186)                       | 4.4                                 | 1146                         | 279                     | 100                 |
| CZ-511 | Opava           | Karlovice            | 150.9                      | 854 (503-1437)                       | 3.9                                 | 1146                         | 295                     | 106                 |
| CZ-512 | Opava           | Krnov                | 173.3                      | 547 (318-912)                        | 5.7                                 | 1024                         | 205                     | 59                  |
| CZ-513 | Opavice         | Krnov                | 369.2                      | 668 (315-1437)                       | 7.5                                 | 728                          | 134                     | 59                  |
| CZ-601 | Lesti           | Solanec              | 10.4                       | 700 (513-874)                        | 6.4                                 | 1131                         | 224                     | 112                 |
| CZ-602 | Vsetinska Becva | Velke Karlovice      | 68.3                       | 749 (524-1042)                       | 6.0                                 | 1131                         | 252                     | 112                 |
| CZ-603 | Roznovska Becva | Horni Becva          | 14.1                       | 745 (568-966)                        | 6.4                                 | 1203                         | 274                     | 146                 |
| CZ-604 | Celadenka       | Celadna              | 31.0                       | 803 (536-1187)                       | 5.9                                 | 1264                         | 236                     | 139                 |
| CZ-605 | Ostravice       | Stare Hamry          | 73.3                       | 707 (542-922)                        | 6.7                                 | 1169                         | 257                     | 138                 |
| CZ-606 | Mohelnice       | Raskovice            | 35.4                       | 765 (473-1209)                       | 6.5                                 | 1373                         | 305                     | 148                 |
| CZ-607 | Moravka         | Uspolka              | 22.2                       | 763 (560-1104)                       | 6.4                                 | 1391                         | 309                     | 160                 |
| CZ-608 | Skalka          | Uspolka              | 18.9                       | 785 (571-1029)                       | 5.6                                 | 1234                         | 295                     | 154                 |
| CZ-609 | Slavic          | Slavic               | 15.1                       | 827 (575-1016)                       | 5.5                                 | 1275                         | 304                     | 161                 |
| CZ-610 | Ropicanka       | Reka                 | 12.2                       | 696 (454-1008)                       | 6.4                                 | 1180                         | 249                     | 130                 |
| CZ-611 | Lomna           | Jablunkov            | 69.9                       | 667 (390-1011)                       | 6.2                                 | 1180                         | 250                     | 107                 |
| CH-101 | Mentue          | Yvonand              | 105.3                      | 690 (469-915)                        | 8.8                                 | 1115                         | 93                      | 38                  |
| CH-102 | Sense           | Thörisshaus          | 351.2                      | 1091 (551-2096)                      | 6.6                                 | 1480                         | 264                     | 94                  |
| CH-103 | Gürbe           | Belp                 | 116.1                      | 845 (518-2169)                       | 7.7                                 | 1272                         | 160                     | 78                  |
| CH-104 | Emme            | Eggiwil              | 124.4                      | 1308 (770-2022)                      | 5.5                                 | 1710                         | 456                     | 155                 |
| CH-105 | Ilfis           | Langnau              | 187.4                      | 1060 (699-1973)                      | 6.6                                 | 1700                         | 360                     | 107                 |
| CH-106 | Langeten        | Huttwil              | 59.9                       | 770 (632-1032)                       | 7.6                                 | 1334                         | 188                     | 62                  |
| CH-107 | Ergolz          | Liestal              | 261.2                      | 604 (305-1087)                       | 8.9                                 | 1126                         | 105                     | 47                  |
| CH-108 | Kleine Emme     | Emmen                | 478.3                      | 1080 (440-2261)                      | 6.6                                 | 1654                         | 330                     | 136                 |
| CH-109 | Alp             | Einsiedeln           | 46.7                       | 1173 (878-1577)                      | 5.8                                 | 2025                         | 388                     | 190                 |
| CH-110 | Minster         | Euthal               | 59.1                       | 1362 (891-1994)                      | 5.2                                 | 2187                         | 594                     | 273                 |
| CH-111 | Murg            | Wängi                | 80.1                       | 657 (469-930)                        | 8.2                                 | 1348                         | 133                     | 59                  |

| ID     | Catchment          | Gauging station | Area<br>[km <sup>2</sup> ] | Mean elevation (range)<br>[m a.s.l.] | Annual mean air temperature<br>[°C] | Annual precipitation<br>[mm] | Annual snowfall<br>[mm] | Maximum SWE<br>[mm] |
|--------|--------------------|-----------------|----------------------------|--------------------------------------|-------------------------------------|------------------------------|-------------------------|---------------------|
| CH-112 | Rietholzbach       | Mosnang         | 3.2                        | 774 (697-868)                        | 7.8                                 | 1556                         | 179                     | 117                 |
| CH-113 | Necker             | Mogelsberg      | 88.1                       | 970 (649-1372)                       | 6.7                                 | 1750                         | 298                     | 129                 |
| CH-114 | Sitter             | Appenzell       | 74.4                       | 1274 (769-2501)                      | 5.4                                 | 1895                         | 421                     | 223                 |
| CH-115 | Goldach            | Goldach         | 50.4                       | 825 (401-1178)                       | 7.8                                 | 1426                         | 197                     | 73                  |
| CH-201 | Grande Eau         | Aigle           | 131.6                      | 1624 (427-3154)                      | 4.4                                 | 1710                         | 526                     | 260                 |
| CH-202 | Simme              | Oberwil         | 343.7                      | 1632 (776-3242)                      | 3.9                                 | 1653                         | 545                     | 231                 |
| CH-203 | Allenbach          | Adelboden       | 28.8                       | 1930 (1321-2587)                     | 3.4                                 | 1666                         | 581                     | 341                 |
| CH-204 | Krummbach          | Klusmatten      | 19.8                       | 2276 (1795-3269)                     | 1.3                                 | 1463                         | 665                     | 554                 |
| CH-205 | Grosstalbach       | Isenthal        | 43.9                       | 1880 (781-2700)                      | 2.8                                 | 1818                         | 710                     | 277                 |
| CH-206 | Dischmabach        | Davos           | 42.9                       | 2434 (1657-3024)                     | -0.4                                | 1003                         | 384                     | 330                 |
| CH-207 | Ova da Cluozza     | Zernez          | 27.0                       | 2361 (1507-3160)                     | -0.9                                | 955                          | 292                     | 265                 |
| CH-208 | Ova dal Fuorn      | Zernez          | 55.2                       | 2359 (1797-3032)                     | -0.7                                | 949                          | 385                     | 193                 |
| CH-301 | Riale di Calneggia | Caverigno       | 23.9                       | 2079 (881-2827)                      | 3.2                                 | 1927                         | 693                     | 437                 |
| CH-302 | Verzasca           | Lavertezzo      | 185.1                      | 1723 (546-2679)                      | 4.7                                 | 2038                         | 455                     | 267                 |
| CH-303 | Cassarate          | Pregassona      | 75.8                       | 1017 (286-1904)                      | 7.9                                 | 1889                         | 227                     | 86                  |

**Table S2: Mean seasonal (Nov-Apr) modeled values of all climate and snow characteristics (listed in Table 2 in Section 2.6) for individual projections (Section 2.5). This includes seasonal mean air temperature ( $T_{\text{mean}}$ ), sum of all precipitation ( $P_{\text{sum}}$ ), mean snow water equivalent ( $SWE_{\text{mean}}$ ), maximum snow water equivalent ( $SWE_{\text{max}}$ ), sum of snowfall ( $S_{\text{sum}}$ ) and snowfall fraction ( $S_f$ ).**

| Projection | Czech and German catchments |                          |                             |                            |                          |              | Swiss catchments          |                          |                             |                            |                          |              |      |
|------------|-----------------------------|--------------------------|-----------------------------|----------------------------|--------------------------|--------------|---------------------------|--------------------------|-----------------------------|----------------------------|--------------------------|--------------|------|
|            | $T_{\text{mean}}$<br>[°C]   | $P_{\text{sum}}$<br>[mm] | $SWE_{\text{mean}}$<br>[mm] | $SWE_{\text{max}}$<br>[mm] | $S_{\text{sum}}$<br>[mm] | $S_f$<br>[-] | $T_{\text{mean}}$<br>[°C] | $P_{\text{sum}}$<br>[mm] | $SWE_{\text{mean}}$<br>[mm] | $SWE_{\text{max}}$<br>[mm] | $S_{\text{sum}}$<br>[mm] | $S_f$<br>[-] |      |
| T0         | P08                         | -0.5                     | 401                         | 41                         | 109                      | 190          | 0.46                      | -0.3                     | 513                         | 72                         | 146                      | 273          | 0.53 |
|            | P09                         | -0.5                     | 451                         | 48                         | 126                      | 214          | 0.46                      | -0.3                     | 578                         | 83                         | 168                      | 308          | 0.53 |
|            | P1                          | -0.5                     | 501                         | 56                         | 144                      | 237          | 0.46                      | -0.3                     | 642                         | 95                         | 191                      | 342          | 0.53 |
|            | P11                         | -0.5                     | 551                         | 65                         | 161                      | 261          | 0.46                      | -0.3                     | 705                         | 107                        | 213                      | 376          | 0.53 |
|            | P12                         | -0.5                     | 601                         | 73                         | 179                      | 285          | 0.46                      | -0.3                     | 770                         | 120                        | 237                      | 410          | 0.53 |
| T1         | P08                         | 0.5                      | 401                         | 25                         | 79                       | 148          | 0.36                      | 0.7                      | 513                         | 54                         | 113                      | 222          | 0.44 |
|            | P09                         | 0.5                      | 451                         | 29                         | 91                       | 167          | 0.36                      | 0.7                      | 578                         | 62                         | 130                      | 250          | 0.44 |
|            | P1                          | 0.5                      | 501                         | 34                         | 103                      | 185          | 0.36                      | 0.7                      | 642                         | 71                         | 147                      | 277          | 0.44 |
|            | P11                         | 0.5                      | 551                         | 40                         | 116                      | 204          | 0.36                      | 0.7                      | 705                         | 80                         | 165                      | 305          | 0.44 |
|            | P12                         | 0.5                      | 601                         | 45                         | 129                      | 222          | 0.36                      | 0.7                      | 770                         | 90                         | 183                      | 333          | 0.44 |
| T2         | P08                         | 1.5                      | 401                         | 14                         | 55                       | 111          | 0.27                      | 1.7                      | 513                         | 39                         | 86                       | 173          | 0.34 |
|            | P09                         | 1.5                      | 451                         | 16                         | 64                       | 125          | 0.27                      | 1.7                      | 578                         | 46                         | 99                       | 195          | 0.34 |
|            | P1                          | 1.5                      | 501                         | 19                         | 72                       | 139          | 0.27                      | 1.7                      | 642                         | 52                         | 112                      | 216          | 0.34 |
|            | P11                         | 1.5                      | 551                         | 22                         | 81                       | 152          | 0.27                      | 1.7                      | 705                         | 59                         | 126                      | 238          | 0.34 |
|            | P12                         | 1.5                      | 601                         | 26                         | 90                       | 166          | 0.27                      | 1.7                      | 770                         | 66                         | 139                      | 260          | 0.34 |
| T3         | P08                         | 2.5                      | 401                         | 7                          | 38                       | 80           | 0.20                      | 2.7                      | 513                         | 28                         | 64                       | 129          | 0.26 |
|            | P09                         | 2.5                      | 451                         | 9                          | 44                       | 90           | 0.20                      | 2.7                      | 578                         | 32                         | 73                       | 146          | 0.26 |
|            | P1                          | 2.5                      | 501                         | 10                         | 49                       | 100          | 0.20                      | 2.7                      | 642                         | 37                         | 83                       | 162          | 0.26 |
|            | P11                         | 2.5                      | 551                         | 12                         | 55                       | 110          | 0.20                      | 2.7                      | 705                         | 42                         | 93                       | 178          | 0.26 |
|            | P12                         | 2.5                      | 601                         | 13                         | 61                       | 120          | 0.20                      | 2.7                      | 770                         | 47                         | 104                      | 194          | 0.26 |
| T4         | P08                         | 3.5                      | 401                         | 4                          | 26                       | 56           | 0.14                      | 3.7                      | 513                         | 19                         | 47                       | 94           | 0.19 |
|            | P09                         | 3.5                      | 451                         | 4                          | 30                       | 63           | 0.14                      | 3.7                      | 578                         | 22                         | 54                       | 106          | 0.19 |
|            | P1                          | 3.5                      | 501                         | 5                          | 34                       | 70           | 0.14                      | 3.7                      | 642                         | 25                         | 61                       | 118          | 0.19 |
|            | P11                         | 3.5                      | 551                         | 6                          | 38                       | 77           | 0.14                      | 3.7                      | 705                         | 29                         | 68                       | 129          | 0.19 |
|            | P12                         | 3.5                      | 601                         | 7                          | 42                       | 84           | 0.14                      | 3.7                      | 770                         | 32                         | 76                       | 141          | 0.19 |
