# Supplementary material for: Rain-on-snow events in mountainous catchments under climate change
Source: Copernicus journal article supplement (doi:10.5194/egusphere-2024-2274), 2024-10-08
Supplement: Supplementary file [file egusphere-2024-2274-AC2-supplement.pdf]

## Author's response to the Reviewer 1

Black text: Referee comment

Blue text: Authors' response

In this manuscript, the authors evaluate the sensitivity of rain-on-snow (RoS) events and their associated contribution to annual runoff given incremental changes to annual temperature and precipitation magnitudes. They test this by perturbing meteorological conditions from a 30-year reference period (1980-2010) over 93 catchments focused in Czechia, Germany, and Switzerland. This study finds that changes to RoS events depended on the geographic region, with approximately 75% of the lower-elevation Czech catchments demonstrating decreases in RoS with the largest (4 C) increases in temperature. The higher-elevation Swiss catchments were less-sensitive overall, with a higher frequency of unique temperature and precipitation perturbations driving increases to the number of RoS events. Interestingly, the results also show slightly different physical relationships between RoS days and multiple climate and snow variables in the two regions, suggesting different physical drivers of RoS occurrence. Finally, the authors go further by demonstrating how climate-driven changes to RoS events will alter historical RoS contributions runoff, both seasonally and annually.

I would like to commend the authors on their hard work and interesting manuscript. It was clear to me that a considerable amount of work went into this study, and I believe that the methodology, results, and presentation would lend itself well to the scope of HESS. However, I had two main concerns about the study. First, while the study demonstrated interesting sensitivities to incremental changes to both temperature and precipitation, there were a number of methodological and modeling decisions that could be influencing the main results. These include: a precipitation thresholding approach that excludes mixed-phase precipitation, the snow-state requirements used to prescribe the occurrence of a RoS event, the likelihood of unique combinations of temperature and precipitation perturbations, and the assumption of stationary changes in climate. While I don't think it's necessary for an investigation and discussion of these modeling decisions to be a major part of the manuscript, more should be done to establish whether the impacts on RoS and runoff presented by this research are outside the uncertainties that could be driven from the model decisions listed above. Secondly, not enough information on the change to snow cover was included, making it difficult to determine the extent to which RoS frequency was altered by changes to snow cover duration, relative to changes in precipitation phase. A deeper discussion on both of these comments are included in the "Major comments" below.

My recommendation is that this manuscript be returned to the authors for major revisions. Again, I would like to thank the authors for their contribution, and I really enjoyed reading this study. I would be delighted to review this manuscript again if the authors choose to continue with HESS.

Thank you for the review of our manuscript. We greatly appreciate your constructive comments and suggestions. Please find our point-by-point response below (in blue).

### Major comments

Introduction: The authors do a really nice job at gathering and citing a number of the most relevant studies on RoS. However, the introduction often alludes to findings, complexities, shortfalls, and

uncertainties in these studies without providing details or examples. The authors should consider using some of the literature review to clearly indicate the specific gaps to be addressed by this study. As an example, some of these things that could have been addressed more explicitly include: the list of “unsolved problems” in line 35, the processes/interactions that make RoS events and the resulting hydrology “complex in nature” (line 47), a deeper discussion of what is meant by “compound effect” (compounded uncertainties from estimates of snow cover and predictions of rainfall?, line 48), and what explicitly is included in the “different climate variables” (line 65).

We agree with your comment and will revise the introduction and expand this section to provide more details of the referenced studies and clarify the gaps addressed by our study. The particular changes will include better highlighting the novelty of our study, explaining the main drivers of the RoS variability (the complexity of the process) and the role of climate variables (air temperature and precipitation), which, together with snowpack, jointly influence changes in the frequency of ROS events and their runoff responses.

As noted by the authors, RoS occurrence and severity depends on both snow cover existing, and warm temperatures coinciding with a precipitation event. Given this, more should be done throughout the manuscript to establish that the results are statistically-significant provided the uncertainties from the experimental setup. For example:

1. My understanding of the modeling setup is that although the threshold used to partition rain and snow could change based on the basin, it didn't allow mixed-phase precipitation meaning that all of a given timestep's precipitation fell as snow or rain given the smallest of changes in temperature across any given temperature threshold. Since mixed-phase precipitation can often occur across large spreads in temperature, do the authors know how the decision to use a static temperature threshold impacted the frequency of RoS relative to a threshold that allowed mixed-phase rain and snow? My hypothesis is that allowing mixed-phase while keeping the decision to filter drizzle (daily precip < 5 mm) may result in less-sensitive changes to RoS in response to changes in temperature.

Thank you for raising this important point. You are correct that our approach does not allow mixed-phase precipitation, as we applied a temperature threshold (TT) to classify precipitation as either rain or snow. The parameter TT was calibrated in the model separately for each catchment. To address your comment, we will perform supplementary analyses to test how different TT values (e.g., within some range around the calibrated value) influence the number of RoS days. We hypothesise that the absolute number of RoS days will change, but the relative variability and trends will remain unchanged, including relative changes in RoS days for different perturbations. Besides this additional analysis, we will expand the discussion section by adding some studies that tested the influence of different TT values on snow routine simulations including different snow/rain separation approaches. For example, a study by Girons Lopez et al. (2020) tested several modifications of the HBV model snow routine in Swiss and Czech catchments (a subset of those used in this study), including those assuming different snow/rain separation approaches. The study showed that the snow routine currently employed in the HBV model provided relatively good results, and none of the tested modifications resulted in substantially increased model performance.

2. I like the authors' decision to filter regions where RoS occurred based on a SWE state threshold of 10 mm. However, it's worth noting that larger footprints of shallow snow experiencing a RoS event may still contribute significantly to the hydrologic pulse. This may be particularly true in future climates, and across shallow-snow regions which melt more-readily and rapidly with the heightened turbulent, latent, and sensible heat fluxes during RoS events. Did the authors test other SWE thresholds?

We agree that shallow snow can contribute significantly to hydrological responses during RoS events, particularly in future climates where shallow snow is expected to occur more often and will be more susceptible to rapid melting. In our analysis, we chose the 10 mm SWE threshold to ensure that RoS days/events were defined in areas with meaningful snow cover. However, this 10 mm SWE threshold represents a catchment mean. Thus, it covers a variety of possible snow distribution, such as equally distributed snow cover across the catchment or higher snowpack at high elevations and no snowpack at lower elevations. As we did not explicitly test other SWE thresholds in this study, we will now make a simple supplementary test of different SWE thresholds (5 mm, 20 mm) to see how the threshold is sensitive to the absolute value of identified RoS days (similarly as described in point 1 above). Additionally, we will better discuss this issue in the discussion section.

3. The combinations of the precipitation and temperature perturbations are presented as if each of these are equal-likelihood. While I like this structured investigation of impacts from incremental changes to both temperature and precipitation, there are some edge-case scenarios that may be less likely given projected changes to climate (e.g., T4\_P08). The authors should consider adding some text to ground which combinations of temperature and precipitation changes, and resulting changes to RoS frequency and severity, may be more and less-likely to emerge in future climates.

We agree that not all combinations of tested perturbations are equally likely to occur under projected climate. We will discuss this issue carefully and add some text to indicate which perturbations are closer to the expected future climate (e.g., +2 and +3°C and P09, P1 and P11). However, we should also emphasize more that the methodological approach we used in our study was designed to systematically investigate the sensitivity of catchment response to changes in climate variables (air temperature and precipitation) rather than project changes in RoS in future climate.

4. My overarching largest concern is the assumption of stationary changes in climate. For example, I believe this modeling setup applied a constant multiplier to the historical precipitation record, preserving the timing, severity, and frequency of precipitation, and how it aligned with swings in temperature. Provided the fact that both winter precipitation magnitude and frequency is expected to change in future climates (and more so in the winter than the summer), and that these may be more likely to coincide with moist and warm temperatures, it's likely that an increase to the frequency of precipitation events may overwhelm some of the changes to RoS frequency and severity driven by stationary changes to temperature and precipitation. The authors should investigate this.

We are aware that our assumption of climate stationarity simplifies the complexities of future climate changes, particularly the shifts in precipitation patterns and their interactions with temperature. However, as also mentioned in our previous response, our analyses should not be interpreted as the projection of future climate. We will improve the discussion regarding these limitations and our modelling setup.

While some of the points from above are mentioned briefly in the study discussion, the authors should consider expanding on them to investigate where, when, and in what cases the RoS sensitivities reported by this study fall outside of the noise expected from the experimental setup and procedure. The authors could consider test cases using the full range of years and catchments, or case-studies based on catchments comparing the least (e.g., coldest and driest) and most-sensitive (e.g., catchments within the transition zone) locations.

Thank you for your suggestion. We consider presenting some results just for a few selected catchments with contrasting characteristics and for contrasting years (cold/warm, wet/dry). We will

present the results in a supplement. This will enhance the robustness and relevance of our study and address your concern effectively.

Except for Figure 8, there is little presented about the impact that changes to temperature and precipitation have on simulated snow cover. This is particularly important since changes in RoS frequency can be driven to a first-order by changes to snow cover. Additionally, the model used in this study simulated 100 m elevation bands, thereby assuming full or absent snow cover for the full band while some level of fractional snow cover likely existed. Many of the projected decreases to RoS frequency are consistent with the signals expected for a reducing snow cover. However, this isn't presented explicitly. There are also some results that suggest that there may be RoS increases driven by an increase in the snow cover duration. For example, Figure 5 shows an increase (relative to the historical) in the percent of RoS days from T2\_P1 to T2\_P12 in the Western Sudetes. Given 1) that only the magnitude and not the frequency/timing of precipitation events aren't changing between T2\_P1 and T2\_P12, and 2) temperature is not changing between T2\_P1 and T2\_P12, the ~25% increase in RoS frequency between these two models must have been driven by changes in snow cover. Is that correct? Are these increases in RoS frequency happening earlier or later in the snow season, and across what elevation bands?

Thank you for this comment. Snow cover indeed plays a critical role in driving RoS dynamics. Therefore, it is worth adding more about linking changes in snow cover to RoS frequency to describe these connections better. To show this, we will take all precipitation days and distinguish them into four categories: 1) precipitation is classified as snowfall falling on snow-free ground, 2) precipitation is classified as snowfall falling on existing snow cover (>10 mm SWE), 3) precipitation is classified as rainfall falling on the snow-free ground, and 4) precipitation is classified as rainfall falling on existing snow cover. In the next step, we will examine how these categories change for individual perturbations. This approach enables us to calculate, e.g., whether the changes in RoS days (category rain on snow cover) are driven by disappearing/advancing snow cover or by changes in the precipitation phase.

Section 3.7: I really like this analysis on the runoff response! This is a great advancement on the field of RoS studies.

Thank you for the positive comment. The runoff response analysis was indeed one of the main aims of our study and we believe it brought some novel results to our study.

### **Minor comments**

Line 8: Change "increase" to "increases" in order to match the tense of "changes".

It will be changed, thank you.

Line 8: "Occurrence" is used throughout to reference RoS events. The authors could consider revising "snow occurrence" to "snow cover" in this context (also line 51).

We agree, and we will change the wording.

Line 10: Delete "were evaluated"

It will be deleted.

Lines 34 – 36: Without more context provided for the "unsolved problems", this paragraph doesn't provide a lot of new information, especially considering the literature review provided in the

following paragraphs. I think the authors could consider removing these lines. I would have the same comment for the last line of the following paragraph: “Much of the current research ... under ongoing climate change”.

We will consider removing the text or providing more context.

Line 57: What is meant by “spatial and temporal distribution”? Is this referencing the changes to snow cover in time and space, in addition to the changes to rainfall frequencies?

Spatial and temporal distribution of RoS occurrence was meant here. We will change the wording to be more precise.

Lines 100 – 101: In instances where a station came from outside of the catchment bounds, how far away were these stations, on average? What was the maximum and minimum distances, and what sort of uncertainties could be expected for the stations that are the furthest away?

You are correct that, in some cases, the weather stations used to drive the HBV model were located outside the catchments. However, this issue is relevant only for some Czech catchments since gridded data were used for Swiss catchments. If such a situation occurred, we tried to select the closest station possible (usually up to 10-20 km from the catchment border) located within the elevation range of the specific catchment. The distances were usually shorter for precipitation than for air temperature since the network of gauging stations measuring only precipitation is denser than that of fully equipped climate stations. We will expand this section in the revised version with additional information above.

Line 109: Is there a citation for the MeteoSwiss gridded meteorology product? What is the spatial resolution of this forcing?

The precipitation and temperature data is in 2km spatial resolution, and the SWE data is in 1km resolution. We will add this information, together with the correct reference, to the revised version.

Line 144: Replace “e.g. Hotovy et al. (2023)” with “(Hotovy et al., 2023)”.

We will replace it.

Lines 154 – 156: I’m finding this passage a little confusing. The authors specify that RoS events are “multi-day” events, but then follow by saying that RoS events can include both RoS days and non-RoS days. Does this just mean that the runoff can peak after the date of the actual rainfall?

Yes, you are right. The idea was to define these two situations separately, to distinguish between causing events (days with rain) and subsequent runoff responses, which usually last longer. We will rewrite the text to be clearer for readers.

Line 166: Why does P08 correspond with -20%? Can these just be named based on their percent-perturbations (e.g., P-20% or P80%)?

Thank you for your suggestion. We considered different ways of naming the individual perturbations while writing the original manuscript, realizing that there are certainly more equivalents. The P08 perturbation (for example) represents 0.8 multiplication of the original precipitation in the reference period (POT1). Nevertheless, we will consider the naming options again.

Figure 3: I'm having a difficult time distinguishing the different colors, and especially in instances when the points are separated further in space. The authors could consider a few things: 1) testing different color bars, 2) adapting both the point color and size to correspond with the average RoS day occurrence, and/or 3) breaking this plot into two separate subplots -- one with a y-axis corresponding to RoS days per year and the other with the average RoS day occurrence.

Figure 3: How large is the spread in the timing of the RoS day occurrence? If the authors choose to break this into a different subplot, they could consider including whiskers to show this.

Thank you for both suggestions related to Figure 3. We will prepare alternatives as suggested and consider the best and most informative one.

Line 213: This is a huge number of RoS events! Is there evidence to back up that this is grounded in reality?

Unfortunately, we are not able to provide the evidence based on measurements. The absolute values of the simulated RoS days are indeed affected by selected thresholds used for their calculations (such as snow/rain temperature or minimum SWE) as described in our responses to major comments above (we refer to our explanation there). However, in our previous study, Hotovy et al. (2023) (supplementary Fig. S4), we provided a comparison of the number of RoS days for Czech catchments (similar selection as in this current manuscript) calculated using observed and simulated data (although using a single threshold temperature threshold) showing overall good fit between observed and simulated values. Therefore, the number of RoS days may be realistic. It is worth noting that the majority of RoS events do not produce significant runoff response as shown also by Juras et al. (2021) for Czech catchments.

Figure 7b: It looks like there are two solid yellow (TO\_P1) lines. My guess is that the rightmost line actually represents TO\_P12.

Thank you for this point. We have already realized this mistake, and we will correct this in the revised manuscript.

## References

Girons Lopez, M., Vis, M. J. P., Jenicek, M., Griessinger, N., & Seibert, J. (2020). Assessing the degree of detail of temperature-based snow routines for runoff modelling in mountainous areas in central Europe. *Hydrology and Earth System Sciences*, 24(9), 4441–4461. <https://doi.org/10.5194/hess-24-4441-2020>

Hotovy, O., Nedelcev, O., & Jenicek, M. (2023). Changes in rain-on-snow events in mountain catchments in the rain–snow transition zone. *Hydrological Sciences Journal*, 68(4), 572–584. <https://doi.org/10.1080/02626667.2023.2177544>

Juras, R., Blöcher, J. R., Jenicek, M., Hotovy, O., & Markonis, Y. (2021). What affects the hydrological response of rain-on-snow events in low-altitude mountain ranges in Central Europe? *Journal of Hydrology*, 603, 127002. <https://doi.org/10.1016/j.jhydrol.2021.127002>
